# Supplementary material
Source: ML conference proceedings conference paper supplement (https://openreview.net/forum?id=uydP1ykieNv)
Supplement: supplementary_material [file attachment]

# **Code for Testing the Ensemble-in-One Models**

## **Acknowledgement**

We borrow the codes of DVERGE for testing the robustness of our models for fairly comparing the effectiveness of different methods. The dependencies, data and pre-trained models of Baseline, ADP, GAL, and DVERGE can refer to the README.md in the code file. The original repo is [git@github.com:zjysteven/DVERGE.git](https://github.com:zjysteven/DVERGE.git)

## **Evaluation**

Examples of evaluation scripts can be found in `scripts/evaluation.sh`. We have already put our models in the checkpoints file.
